# Supplementary material
Source: publisher figshare collection journal article supplement (https://acs.figshare.com/ndownloader/files/4117339)
Supplement: Supplementary file 1 [file 4117339]

**Supporting Information:** Colloidal Stability and Magnetophoresis of Gold-Coated Iron Oxide Nanorods in Biological Media

By Swee Pin Yeap,<sup>†</sup> Pey Yi Toh,<sup>†</sup> Abdul Latif Ahmad,<sup>†</sup> Siew Chun Low,<sup>†</sup> Sara. A. Majetich<sup>‡</sup> and Jit Kang Lim<sup>\*,†,‡</sup>

<sup>†</sup>School of Chemical Engineering, Universiti Sains Malaysia, Nibong Tebal, Penang 14300, Malaysia.

<sup>‡</sup>Department of Physics, Carnegie Mellon University, Pittsburgh, PA 15213, USA.

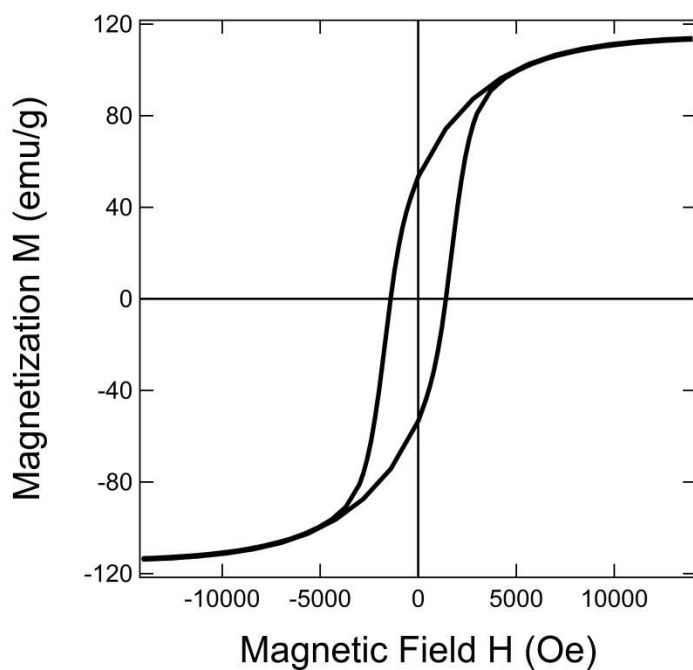

Figure SI. Magnetization hysteresis curve for TODA nanorods.

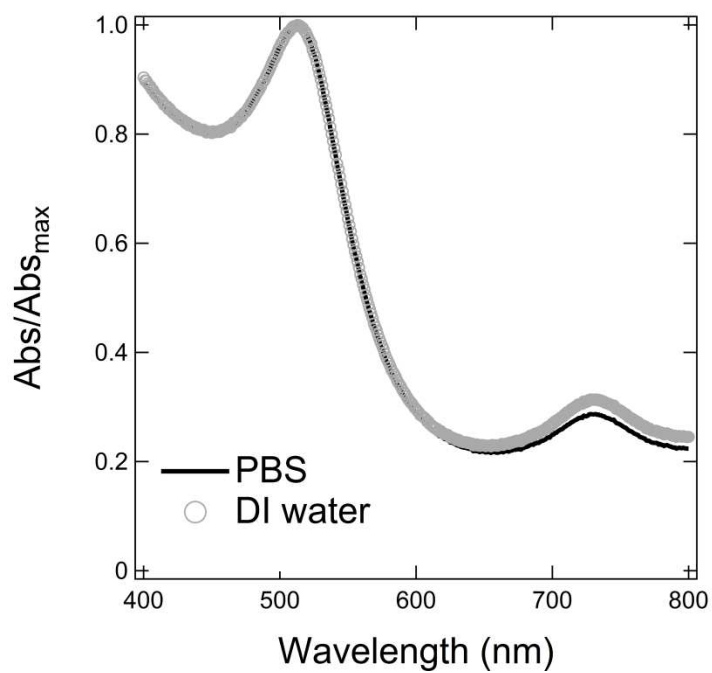

Figure SII. Absorbance spectra of uncoated Fe/Au NRs in DI water and PBS.

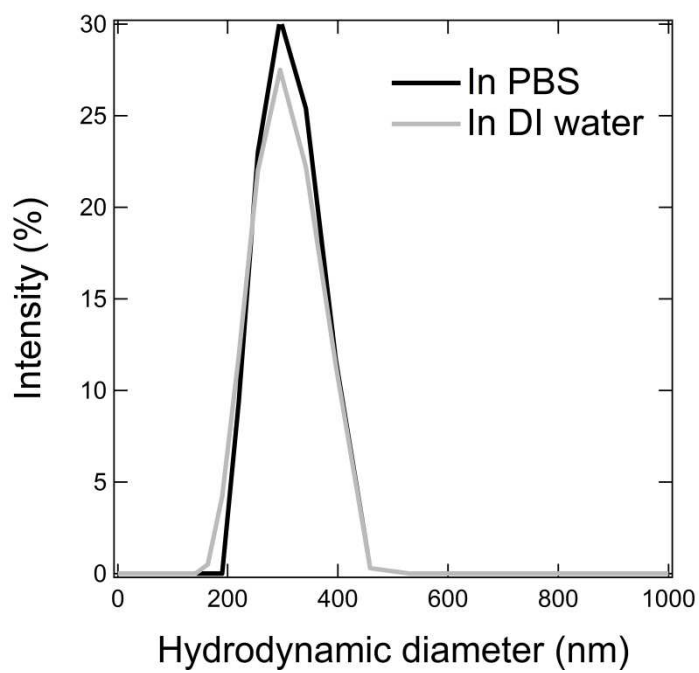

Figure SIII. Size distribution of uncoated Fe/Au NRs in DI water and PBS.
